WINTER 2019 | VOLUME 17 | NUMBER 1

# Focus

The Journal of Lifelong Learning in Psychiatry

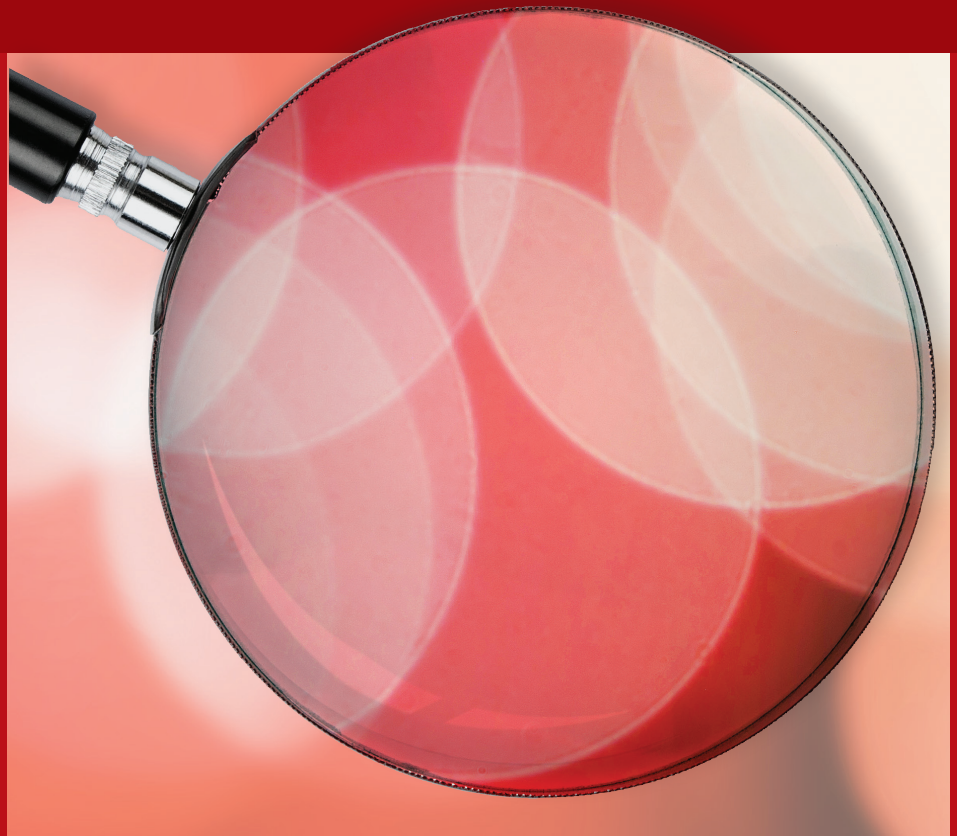

## Neuroscience-Informed Treatments

Guest Editor: Mayada Akil, M.D.

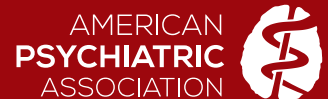

[focus.psychiatryonline.org](http://focus.psychiatryonline.org)
