**The Newest Addition to APA Publishing's Portfolio of Journals**

# The American Journal of Psychotherapy

[psychotherapy.psychiatryonline.org](http://psychotherapy.psychiatryonline.org)

**Holly A. Swartz, M.D., Editor-in-Chief**

*The American Journal of Psychotherapy* is a peer-reviewed, interdisciplinary journal published quarterly by the American Psychiatric Association. Begun in 1947 by the Association for the Advancement of Psychotherapy, *The American Journal of Psychotherapy* provides a forum for advancing the theory, science, and clinical practice of psychotherapy, publishing articles that expand the understanding of psychotherapies, especially in the domains of efficacy, process, education, and practice.

The journal publishes empirical papers on psychotherapy outcomes, process, measurement, and education. Maintaining a strong clinical focus, it welcomes case reports, review articles, and training tools that will guide and shape clinical practice.

*The American Journal of Psychotherapy* invites a broad range of perspectives from all psychotherapy disciplines, including but not limited to psychodynamic, interpersonal, cognitive- or dialectical-behavioral, existential, emotion-focused, problem-solving, mentalizing, mindfulness-based, and client-centered approaches.

*The American Journal of Psychotherapy* inclusively addresses topics across treatment modalities, age groups, genders, races and ethnicities, and diagnoses. The journal serves the international community by curating a vibrant, pluralistic, dialogue about psychotherapy that ultimately will inform clinical care.

**Subscribe Now!** .....

 **Visit [appi.org](http://appi.org) for pricing and more information!**

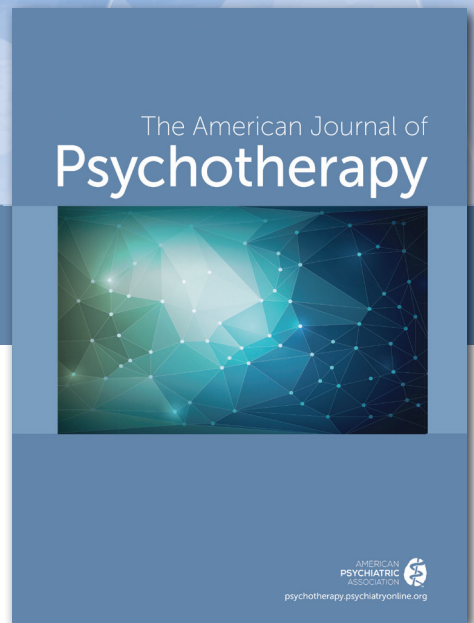

2018 • Vol. 71

Frequency: Quarterly

Online ISSN: 2575-6559

[psychotherapy.psychiatryonline.org](http://psychotherapy.psychiatryonline.org)

AMERICAN  
PSYCHIATRIC  
ASSOCIATION  
PUBLISHING

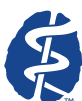

[appi.org](http://appi.org)  
1-800-368-5777  
[appi@psych.org](mailto:appi@psych.org)

[psychotherapy.psychiatryonline.org](http://psychotherapy.psychiatryonline.org)

AH1828
